# Supplementary material for: Exploring causal relationship between 41 inflammatory cytokines and marginal zone lymphoma: A bidirectional Mendelian randomization study
Source: Open Med (Wars). 2025 Apr 15;20(1):20251171. doi: 10.1515/med-2025-1171 (PMC12032980; doi:10.1515/med-2025-1171)
Supplement: Supplementary Table 1 [file med-2025-1171-st1.xlsx]

## Sheet: Sheet1
Table S1 Summary of F value of SNPs of 41 inflammatory cytokines
Number	inflammatory cytokines	SNPs	F value
1	B-NGF	rs71641308	21.0539
		rs28637706	35.4305
		rs7970581	23.5093
		rs79343884	21.5191
		rs73472576	20.8343
2	CTACK	rs7333764	22.6105
		rs118084576	21.4148
		rs62578137	21.0008
		rs135564	39.1934
		rs76395525	23.0647
		rs116303454	21.4675
		rs75077631	21.5345
		rs57338032	20.8412
		rs60247384	21.186
		rs72729450	21.9168
		rs2070074	139.888
		rs141331414	22.682
		rs57789542	21.4578
		rs55764737	31.4449
3	EOTAXIN	rs12075	119.133
		rs79722574	23.136
		rs75426604	22.1913
		rs187131	24.9544
		rs11087905	25.7439
		rs80341932	24.5062
		rs59808887	22.7441
		rs2027855	21.0301
		rs2228467	203.723
		rs5754733	24.2948
		rs112347425	33.3885
		rs745331	21.7548
		rs2211994	24.4881
		rs2024050	29.4827
		rs147287945	23.3297
		rs9317045	24.6561
4	FGF-BASIC	rs13412535	25.3967
		rs75168112	22.8907
		rs61990749	24.2968
		rs9903590	23.0124
		rs116745220	21.7533
		rs145577605	22.8858
		rs78873483	20.7907
5	G-CSF	rs117261691	20.9381
		rs115256310	24.9422
		rs74148555	25.0734
		rs11903143	25.7999
		rs586313	22.291
		rs2324653	25.7491
		rs145756094	24.5079
		rs2671444	21.8473
		rs76287671	22.3688
		rs77318030	22.618
6	GROA	rs12075	248.857
		rs1113500	22.8536
		rs76390238	21.1739
		rs185768063	28.2137
		rs140734053	22.5144
		rs62024303	20.8288
		rs78653452	22.4874
		rs118158560	21.7392
		rs508977	189.128
		rs188345231	21.8196
		rs114991247	21.8196
7	HGF	rs1617833	21.9088
		rs13412535	23.9721
		rs180840563	23.6195
		rs57146176	22.5114
		rs4245058	21.9798
		rs5745687	55.4228
		rs2003620	21.8557
		rs11060254	21.2326
		rs3748034	43.0526
		rs3094100	21.79
8	IFN-G	rs10481651	22.2749
		rs112058662	23.5385
		rs2073438	23.9413
		rs11843756	21.4709
		rs73479333	21.8889
		rs78296352	27.6605
		rs74148555	23.9784
		rs12420286	22.2161
		rs7090111	23.7448
		rs2188420	24.9935
		rs115729819	23.8592
		rs113600793	25.4266
9	IL-1B	rs61335305	21.7882
		rs62015704	23.0366
		rs143319329	21.9356
		rs115242021	25.5302
10	IL-1RA	rs187166731	23.1189
		rs61335305	22.7713
		rs35803309	25.2606
		rs6699436	21.1394
		rs11869294	23.644
		rs4441609	20.8866
		rs56134659	22.07
		rs1054402	24.2488
		rs139005642	22.6536
		rs11627423	22.9184
		rs147747784	22.5565
11	IL-2	rs13412535	27.6182
		rs61335305	23.6255
		rs7615304	22.5101
		rs16836080	20.9377
		rs170117	22.2429
		rs2690020	22.3274
		rs62124990	22.1405
		rs4634519	21.7074
12	IL-2RA	rs115360066	22.1804
		rs4733117	24.44
		rs12722497	170.043
		rs759244	21.1177
		rs28441585	21.9155
		rs185231391	22.5701
		rs11241559	22.0497
		rs117244812	23.1602
		rs12799226	21.5086
13	IL-4	rs17713451	24.7959
		rs79597994	21.2157
		rs73023729	24.2059
		rs10512267	26.516
		rs2073438	21.417
		rs6969391	21.3436
		rs2849346	21.7535
		rs9941733	25.4764
		rs9508291	22.0164
		rs6765768	22.7136
		rs117146485	20.8761
		rs12238729	23.1164
		rs116705532	22.8444
		rs13106889	28.0264
		rs7613691	21.8784
14	IL-5	rs6737109	21.2748
		rs148634917	22.6082
		rs7578892	22.6166
		rs9472168	38.388
		rs73040130	27.3219
		rs28793375	21.963
		rs11680908	22.0532
		rs72831687	23.3561
		rs74811276	21.214
15	IL-6	rs13412535	30.7069
		rs72831623	28.4954
		rs4684700	21.2572
		rs76856708	23.2331
		rs199872130	21.351
		rs73273528	23.4808
		rs113098456	20.9816
		rs10982213	23.264
		rs1333040	22.6327
		rs2404476	22.1329
		rs75101555	21.5382
16	IL-7	rs62006410	24.3934
		rs115215018	20.9248
		rs10196226	22.1088
		rs17091524	25.1532
		rs218247	22.1927
		rs6921438	169.536
		rs117509142	22.0525
		rs141425475	22.2288
		rs78346957	21.104
		rs28793375	20.8423
		rs77981494	24.2894
		rs1958987	22.9756
		rs147747784	27.9634
17	IL-8	rs141926526	22.608
		rs12075	23.8509
		rs200282774	22.9741
		rs116726256	21.103
		rs12438669	21.9882
		rs2673604	21.5701
		rs3786107	22.6832
		rs75840288	20.8897
18	IL-9	rs4880409	24.5971
		rs117807175	22.3062
		rs41294750	21.859
		rs76963786	26.3712
		rs73443903	22.078
		rs3736858	21.5421
19	IL-10	rs41282660	21.1763
		rs6085948	23.387
		rs3002131	20.978
		rs383684	21.8037
		rs339203	22.0776
		rs282258	37.5626
		rs6921438	300.088
		rs2375980	26.158
		rs10493718	23.7046
		rs3025021	22.1424
		rs2086656	22.1396
		rs10457128	24.646
		rs6799107	21.2618
		rs7088799	24.0983
		rs10888839	23.1493
		rs1530455	22.2033
		rs111913416	24.1864
20	IL-12-P70	rs2123852	21.3175
		rs782107	24.0419
		rs72831623	27.6203
		rs6993770	23.8377
		rs282258	21.6531
		rs6921438	559.188
		rs34291323	23.2075
		rs71361173	21.5509
		rs199840084	22.0682
		rs2375980	35.8406
		rs35473497	20.9011
		rs273702	22.1195
		rs13209117	27.8104
		rs7088799	35.6939
		rs41282644	21.374
		rs6532374	20.8872
		rs34467391	41.7035
21	IL-13	rs7073807	20.879
		rs138854806	25.0934
		rs77955971	25.7752
		rs12623722	21.3922
		rs6921438	292.36
		rs76339001	24.3695
		rs10995615	21.7565
		rs27949	20.9281
		rs6799107	24.2232
		rs117795020	25.042
		rs75383097	21.4106
		rs139083458	22.4264
		rs147747784	23.2535
22	IL-16	rs1801020	38.3176
		rs116135478	25.6681
		rs144691581	26.457
		rs117916513	23.0211
		rs9706053	22.5906
		rs117217798	21.9921
		rs4253283	33.5318
		rs4778636	133.675
		rs1255143	33.1034
23	IL-17	rs17282552	25.2672
		rs12735700	20.9497
		rs78629931	25.0998
		rs78296352	20.8987
		rs61990749	24.7289
		rs3804753	32.2623
		rs149738638	21.2311
		rs117556572	22.9432
24	IL-18	rs12420140	90.1645
		rs117266781	24.0966
		rs4885797	21.079
		rs78716465	21.8255
		rs17229943	44.1138
		rs7444013	30.9923
		rs143370787	27.262
		rs6517970	21.1337
		rs385076	100.107
		rs1979967	24.1174
		rs10414578	27.404
		rs78623212	24.6417
		rs116383510	26.4513
		rs4482818	25.7322
		rs610473	27.6995
25	IP-10	rs397816	23.8315
		rs75970138	21.8171
		rs6707974	21.803
		rs9450351	29.4949
		rs79848609	22.0694
		rs34383175	23.9416
		rs143799975	21.2397
		rs4862111	20.8538
		rs7645625	22.3497
		rs113831257	32.2118
		rs8112909	21.8919
26	M-CSF	rs9387100	21.6533
		rs78296352	22.0977
		rs34089869	22.5342
		rs62294910	25.521
		rs56367447	30.9833
		rs117867915	22.7006
		rs116274860	22.554
		rs12962919	21.0539
		rs4269021	23.7853
		rs11963606	20.9158
		rs72723242	21.0346
27	MCP_1_MCAF	rs10744620	23.6465
		rs112313229	28.0289
		rs12075	201.444
		rs7517040	26.0575
		rs7033586	22.1875
		rs111995966	21.3518
		rs2228467	81.6023
		rs138591554	94.6561
		rs7197349	22.2126
		rs12073356	21.4527
		rs56212190	23.3815
		rs146522229	26.1877
		rs12493471	51.6145
		rs143815843	21.007
		rs9317045	24.2341
28	MCP_3	rs2838065	21.2482
		rs28394764	21.6462
		rs3129806	20.7667
		rs10892381	26.3884
		rs114363841	20.8912
		rs62492260	23.4579
		rs117286643	22.0893
29	MIF	rs2330634	38.6775
		rs2294689	21.7221
		rs11551183	21.2522
		rs113218956	21.9365
		rs141009259	23.2215
		rs12594190	24.6488
		rs3814097	21.4569
		rs200240331	25.9791
		rs35890933	21.0725
		rs13142904	27.5654
30	MIG	rs11177248	22.3905
		rs139010077	21.1408
		rs6679677	24.7731
		rs191555775	30.5817
		rs816960	23.7227
		rs112861654	25.8859
		rs62562991	24.544
		rs13143163	22.0717
		rs1796085	29.4691
		rs111607343	21.8746
		rs77086208	22.1893
		rs55876513	41.5649
		rs117831247	25.9725
31	MIP_1A	rs184154340	22.2511
		rs6900267	23.0271
		rs12690897	21.8254
		rs57786342	24.1109
		rs60198979	22.3988
		rs116615337	21.3869
32	MIP_1B	rs113877493	782.264
		rs76582507	23.2365
		rs2411161	22.1749
		rs6908843	22.7506
		rs116237296	22.4528
		rs9793308	22.6242
		rs281748	21.5548
		rs72799710	22.8314
		rs117657747	21.259
		rs113010081	603.639
		rs55730069	21.7457
		rs76356863	26.8405
		rs5743614	23.0924
		rs1564708	82.3333
		rs141102180	70.766
		rs3760440	58.7636
		rs79068918	97.3373
		rs17138331	23.6238
		rs1437220	20.806
		rs117453826	99.8744
		rs72791296	25.7287
		rs76776296	27.3893
33	PDGF_BB	rs13412535	240.192
		rs73162807	21.4806
		rs4965869	103.655
		rs11766649	21.1737
		rs35859699	21.1461
		rs116445074	23.8826
		rs9941733	26.3327
		rs13037046	21.1728
		rs72777070	27.451
		rs55680718	30.7611
		rs2324229	30.1404
		rs12289510	23.868
		rs9936075	22.1366
		rs11247305	21.4745
34	RANTES	rs147509526	24.7485
		rs62438851	21.2414
		rs9675798	21.8836
		rs72793342	24.0184
		rs112072646	23.995
		rs28695841	26.7384
		rs75077631	22.0943
		rs7170339	22.4341
		rs7000423	27.173
		rs74472919	34.9276
35	SCF	rs13412535	24.994
		rs113127926	22.2965
		rs1568119	27.7305
		rs72678285	21.131
		rs78666213	24.5605
		rs78369473	21.7212
		rs4841899	31.6804
		rs1557570	48.0815
		rs80271436	24.4394
		rs635634	29.3569
		rs7039247	22.1071
36	SCGF_B	rs17876031	34.6707
		rs77954165	21.9046
		rs12480722	21.9426
		rs181218758	41.0036
		rs78217154	20.9505
		rs116924815	67.2617
		rs13287050	21.1556
		rs4656185	68.5137
		rs149009264	21.3357
		rs143829871	21.8597
		rs7815967	21.155
		rs264157	21.4337
		rs1149926	21.3036
		rs151194174	23.2238
		rs117716477	96.2217
		rs112346514	21.5059
		rs150733161	22.0027
		rs139413256	23.1097
		rs34911860	21.7819
37	SDF_1A	rs78037609	22.0224
		rs149893336	20.8396
		rs78883416	22.8972
		rs3988298	22.5389
		rs62194947	21.2043
		rs10474392	27.8379
		rs1600396	20.9118
		rs12141941	22.4293
		rs10013755	27.1796
38	TNF_A	rs10834997	23.0718
		rs79105320	22.4066
		rs111332265	24.3592
		rs7256693	21.1709
		rs115669577	24.1902
39	TNF_B	rs78296352	77.4338
		rs75240021	23.1026
		rs10925040	21.8001
		rs753274	21.708
		rs7629875	24.5953
40	TRAIL	rs17434886	21.2752
		rs28521641	247.666
		rs747324	21.5285
		rs138987090	94.0335
		rs74778900	118.908
		rs79287178	104.988
		rs72899452	21.4555
		rs13278062	25.9582
		rs28431810	23.2788
		rs550057	21.4607
		rs193112415	284.343
		rs57396456	119.483
		rs148051545	24.9465
		rs62093514	362.852
		rs75928541	22.1849
		rs73039026	23.8714
41	VEGF	rs10411345	22.7964
		rs12456390	20.8775
		rs8045833	23.8225
		rs7030781	66.5177
		rs6921438	781.852
		rs10967186	28.2895
		rs4082730	21.2093
		rs10761739	43.4106
		rs13209117	39.2393
		rs73418461	22.982
		rs73872715	21.894
		rs3108686	21.9029
		rs143479231	28.8743
		rs34467391	56.2343
