# Supplementary material for: Exploring causal relationship between 41 inflammatory cytokines and marginal zone lymphoma: A bidirectional Mendelian randomization study
Source: Open Med (Wars). 2025 Apr 15;20(1):20251171. doi: 10.1515/med-2025-1171 (PMC12032980; doi:10.1515/med-2025-1171)
Supplement: Supplementary Table 2 [file med-2025-1171-st2.xlsx]

## Sheet: F_clump_expo_data_MR14
Table S2 Summary of F-values of SNPS for three different pathologic types of lung cancer
Number	SNPs	F value
1	rs16852639	19.6658
2	rs72918021	34.4472
3	rs17358797	19.866
4	rs13108418	21.6649
5	rs27677	20.6823
6	rs11955878	19.6634
7	rs9265797	25.5241
8	rs9359366	20.5233
9	rs1236088	19.959
10	rs72811231	20.7572
11	rs17125650	19.5664
12	rs10140267	20.6221
13	rs62076855	19.7989
