# Supplementary material for: Exploring causal relationship between 41 inflammatory cytokines and marginal zone lymphoma: A bidirectional Mendelian randomization study
Source: Open Med (Wars). 2025 Apr 15;20(1):20251171. doi: 10.1515/med-2025-1171 (PMC12032980; doi:10.1515/med-2025-1171)
Supplement: Supplementary Table 3 [file med-2025-1171-st3.xlsx]

## Sheet: Sheet1
TableS3 Summary of results of forward Mendelian randomization of inflammatory cytokines and marginal zone lymphoma
Inflammatory cytokines	nSNP	IVW-OR	IVW-pval	IVW_heterogeneity-Q_pval	Pleiotropy-pval	Presso-pval
B_NGF	5	0.45508	0.0272881	0.316321	0.287636	0.0918947
CTACK	14	1.11294	0.589219	0.227043	0.696639	0.598347
EOTAXIN	14	1.01602	0.949188	0.251084	0.520965	0.950157
FGF_BASIC	6	1.54435	0.300587	0.587323	0.81485	0.285028
G_CSF	8	0.800578	0.534419	0.671094	0.671009	0.482292
GROA	9	0.939243	0.67195	0.792375	0.820527	0.594484
HGF	6	1.40301	0.535496	0.1006	0.0697461	0.562638
IFN_G	9	1.85087	0.0824317	0.650772	0.620981	0.079189
IL_10	12	1.69204	0.0211545	0.53715	0.963262	0.0335965
IL_12_P70	14	1.40776	0.0637346	0.588449	0.518113	0.0678639
IL_13	10	1.25847	0.151282	0.462636	0.890389	0.179075
IL_16	9	1.01599	0.93146	0.536527	0.817661	0.929006
IL_17	7	0.953096	0.890408	0.821606	0.994458	0.849373
IL_18	12	0.860412	0.368221	0.513768	0.525006	0.369816
IL_1B	4	1.02018	0.95856	0.907299	0.870615	0.911252
IL_1RA	7	1.02059	0.964124	0.0217106	0.285387	0.965583
IL_2	7	0.848771	0.58396	0.213782	0.449801	0.603718
IL_2RA	6	1.01944	0.951274	0.0550245	0.72387	0.953641
IL_4	13	1.3969	0.289118	0.955307	0.626729	0.129158
IL_5	8	1.35914	0.213434	0.625447	0.166175	0.195208
IL_6	9	1.39854	0.354032	0.610596	0.683107	0.327828
IL_7	10	1.16435	0.403005	0.770281	0.913498	0.320425
IL_8	7	1.12858	0.746115	0.13718	0.0638987	0.757103
IL_9	4	1.31124	0.513094	0.66235	0.346137	0.4348
IP_10	9	0.851575	0.512001	0.874724	0.691448	0.369228
M_CSF	9	0.802262	0.31862	0.262208	0.549924	0.347826
MCP_1_MCAF	14	0.979955	0.930911	0.991878	0.536458	0.877184
MCP_3	4	1.00599	0.978563	0.842344	0.803363	0.962463
MIF	6	1.23669	0.484982	0.402406	0.546444	0.516117
MIG	11	1.57445	0.0353702	0.450165	0.301189	0.060457
MIP_1A	4	0.825075	0.610557	0.687972	0.645859	0.520235
MIP_1B	17	1.24465	0.0872722	0.399733	0.926	0.10659
PDGF_BB	12	1.02626	0.906895	0.993873	0.635822	0.818577
RANTES	8	1.56526	0.319327	0.00285974	0.098242	0.352497
SCF	9	0.660834	0.229907	0.615348	0.646852	0.212575
SCGF_B	18	1.17855	0.362993	0.13219	0.311732	0.375711
SDF_1A	7	1.47467	0.430855	0.263368	0.950326	0.460832
TNF_A	5	0.897209	0.736583	0.613704	0.950977	0.701876
TNF_B	4	0.730551	0.150691	0.701524	0.625502	0.127662
TRAIL	13	1.01304	0.948676	0.0810154	0.724853	0.949736
VEGF	11	1.34693	0.0551046	0.690726	0.862336	0.049406
