# Supplementary material for: Exploring causal relationship between 41 inflammatory cytokines and marginal zone lymphoma: A bidirectional Mendelian randomization study
Source: Open Med (Wars). 2025 Apr 15;20(1):20251171. doi: 10.1515/med-2025-1171 (PMC12032980; doi:10.1515/med-2025-1171)
Supplement: Supplementary Table 4 [file med-2025-1171-st4.xlsx]

## Sheet: Sheet1
TableS4 Summary of results of Reverse Mendelian randomization of inflammatory cytokines and marginal zone lymphoma
Inflammatory cytokines	nSNP	IVW-OR	IVW-pval	IVW_heterogeneity-Q_pval	Pleiotropy-pval	Presso-pval
B_NGF	9	0.994856	0.806029	0.760873	0.393363	0.763336
CTACK	9	1.00538	0.794721	0.775041	0.823605	0.746476
EOTAXIN	9	0.999565	0.975046	0.594704	0.601848	0.973106
FGF_BASIC	9	0.993099	0.666024	0.270477	0.573782	0.67742
G_CSF	9	0.980743	0.24538	0.185682	0.166336	0.278864
GROA	9	1.00568	0.852121	0.0319643	0.142226	0.856762
HGF	9	0.980498	0.213701	0.228272	0.884551	0.248903
IFN_G	9	0.965732	0.0147271	0.882582	0.942448	0.00715446
IL_10	9	0.993424	0.649444	0.409115	0.874975	0.661523
IL_12_P70	9	0.990657	0.496053	0.687453	0.836068	0.440988
IL_13	9	1.00813	0.697872	0.924616	0.416589	0.553335
IL_16	9	1.02865	0.246895	0.217981	0.167229	0.280293
IL_17	3	0.962469	0.124732	0.522736	0.469533	-
IL_18	9	1.0375	0.111125	0.263986	0.195389	0.14979
IL_1B	9	0.994139	0.785424	0.485165	0.0838975	0.785516
IL_1RA	9	0.994328	0.782518	0.574437	0.790476	0.769851
IL_2	9	0.986086	0.521458	0.378785	0.466086	0.539385
IL_2RA	9	1.03304	0.180303	0.18902	0.0611411	0.217112
IL_4	9	0.983984	0.246861	0.709344	0.762104	0.197957
IL_5	9	1.01028	0.633451	0.562235	0.182467	0.618077
IL_6	9	0.987114	0.349917	0.534788	0.71559	0.347472
IL_7	9	1.02315	0.282023	0.941662	0.472829	0.110734
IL_8	9	0.999405	0.977265	0.605259	0.140987	0.975316
IL_9	9	1.00581	0.816095	0.165708	0.648404	0.821934
IP_10	9	0.98819	0.573277	0.389768	0.0590619	0.58871
M_CSF	9	1.0122	0.629678	0.474473	0.42423	0.633893
MCP_1_MCAF	9	1.01097	0.477484	0.2736	0.328957	0.497666
MCP_3	8	1.01112	0.775347	0.994722	0.623637	0.476235
MIF	9	1.01844	0.535887	0.0481306	0.4839	0.553103
MIG	9	1.0111	0.680969	0.0879099	0.0868345	0.691762
MIP_1A	9	0.999897	0.99607	0.433468	0.0629934	0.996191
MIP_1B	4	0.968027	0.113755	0.974858	0.932952	0.00979029
PDGF_BB	9	0.987499	0.469896	0.122897	0.1404	0.49048
RANTES	9	0.999218	0.970757	0.805977	0.957741	0.962358
SCF	9	0.996746	0.812904	0.552051	0.973278	0.804684
SCGF_B	9	0.969433	0.157637	0.32745	0.335543	0.195342
SDF_1A	9	0.987249	0.407188	0.306919	0.482352	0.431221
TNF_A	9	1.00108	0.95921	0.892631	0.362984	0.940962
TNF_B	7	0.997773	0.955988	0.199028	0.813162	0.95778
TRAIL	9	1.00394	0.777985	0.42131	0.179162	0.785142
VEGF	9	1.00122	0.938551	0.347095	0.375632	0.940444
